# Supplementary material for: Association between admission haematocrit and mortality among men with acute ischaemic stroke
Source: PubMed Central journal article supplement — Stroke Vasc Neurol. 2018 Apr 24;3(3):160–8. doi: 10.1136/svn-2018-000149 (PMC6169611; doi:10.1136/svn-2018-000149), 2018-04-24
Supplement: svn-2018-000149supp001.pdf [file svn-2018-000149supp001.pdf]

| Supplement 1. Inter-observer Agreement from Chart Abstraction for Select Covariates |       |                   |
|-------------------------------------------------------------------------------------|-------|-------------------|
|                                                                                     | Kappa | Percent Agreement |
| Hematocrit                                                                          | 1.0   | 100               |
| Atrial Fibrillation                                                                 | 1.00  | 100               |
| Cancer                                                                              | 0.72  | 85.7              |
| Myocardial infarction                                                               | 0.94  | 97.1              |
| Percutaneous transluminal coronary angioplasty                                      | 0.89  | 94.3              |
| Chronic Obstructive Pulmonary Disease/Asthma/Bronchitis                             | 0.89  | 94.3              |
| Kidney disease requiring dialysis                                                   | 1.00  | 100               |
| Pneumonia                                                                           | 0.89  | 94.3              |
