# Supplementary material for: Association between admission haematocrit and mortality among men with acute ischaemic stroke
Source: PubMed Central journal article supplement — Stroke Vasc Neurol. 2018 Apr 24;3(3):160–8. doi: 10.1136/svn-2018-000149 (PMC6169611; doi:10.1136/svn-2018-000149), 2018-04-24
Supplement: svn-2018-000149supp002.pdf [file svn-2018-000149supp002.pdf]

Supplement 2. Impact Factors among Variables Associated with Mortality in Acute Ischemic Stroke Patients <sup>a</sup>

|                  | In-hospital<br>Mortality | 30-day<br>Mortality | 6-month<br>Mortality | One-year<br>Mortality |
|------------------|--------------------------|---------------------|----------------------|-----------------------|
|                  | Impact Factor            |                     |                      |                       |
| Age <sup>b</sup> | 0.11                     | 0.12                | 0.30                 | 0.11                  |
| Hematocrit (%)   |                          |                     |                      |                       |
| ≤ 27             | 0.064                    | 0.039               | 0.051                | 0.46                  |
| 28-32            | 0.020                    | 0.014               | 0.070                | 0.063                 |
| 33-37            | 0.032                    | -0.027              | 0.036                | 0.024                 |
| 38-42            | Ref                      | Ref                 | Ref                  | Ref                   |
| 43-47            | 0.042                    | -0.021              | -0.018               | -0.02                 |
| ≥48              | 0.078                    | 0.025               | -0.023               | -0.016                |
| Platelet Count   |                          |                     |                      |                       |
| <100             | 0.043                    | 0.055               | 0.045                | 0.039                 |
| ≥100             | Ref                      | Ref                 | Ref                  | Ref                   |
| Charlson Index   | -0.043                   | 0.032               | 0.064                | 0.080                 |

|                                                 |        |        |        |        |
|-------------------------------------------------|--------|--------|--------|--------|
| NIHSS                                           | 0.39   | 0.28   | 0.27   | 0.23   |
| Modified APACHE-III                             | 0.097  | 0.067  | 0.056  | 0.064  |
| Paroxysmal Atrial Fibrillation                  | 0.045  | 0.024  | 0.032  | 0.036  |
| Cancer                                          | 0.060  | 0.048  | 0.055  | 0.060  |
| Heart Disease                                   | 0.011  | 0.031  | 0.024  | 0.018  |
| COPD                                            | -0.044 | 0.017  | -0.026 | -0.019 |
| History of kidney disease<br>requiring dialysis | -0.045 | -0.026 | -0.025 | -0.024 |
| Hypoxia                                         |        |        |        |        |
| <90%                                            | 0.042  | 0.015  | 0.008  | 0.022  |
| ≥90%                                            | Ref    | Ref    | Ref    | Ref    |
| Pneumonia                                       | 0.036  | 0.050  | 0.077  | 0.068  |

<sup>a</sup> Abbreviations: Ref indicates referent group; Charlson, Charlson Index; APACHE-III, Acute Physiology and Chronic Health Evaluation-III; NIHSS, National Institutes of Health Stroke Scale; COPD, chronic obstructive pulmonary disease.

<sup>b</sup> Age, in ten year increments.
